# Supplementary material for: Ectopic expression of Nav1.7 in spinal dorsal horn neurons induced by NGF contributes to neuropathic pain in a mouse spinal cord injury model
Source: PubMed Central journal article supplement (PMC10020601; doi:10.3389/fnmol.2023.1091096), 2023-03-03
Supplement: Image_1.pdf [file Image_1.pdf]

## Supplementary information

### Supplementary Figures

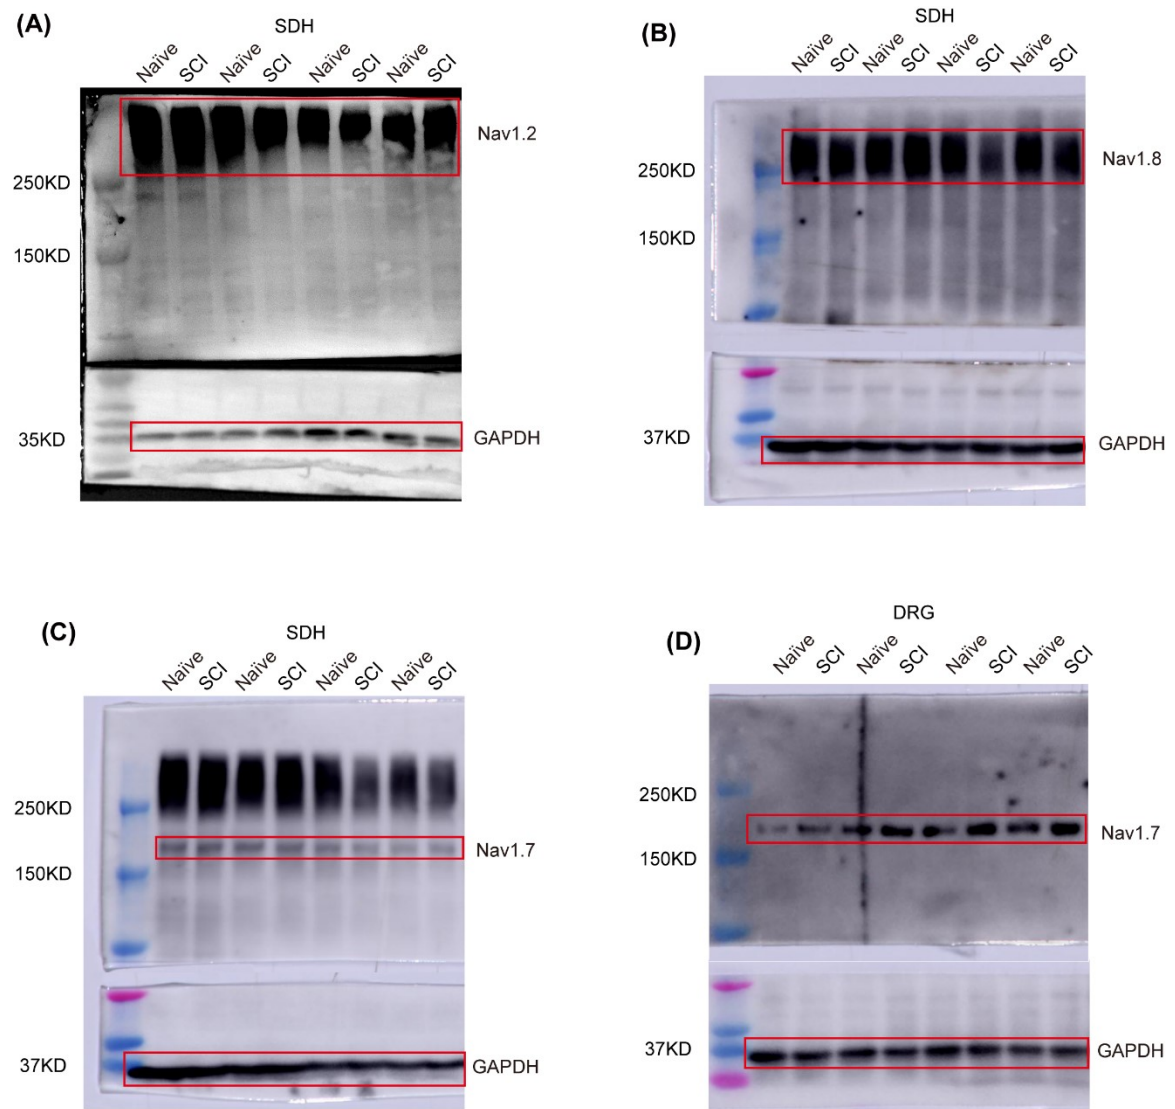

**Supplementary Figure 1.** The entire image of Western-blot membranes showed in Fig. 2.

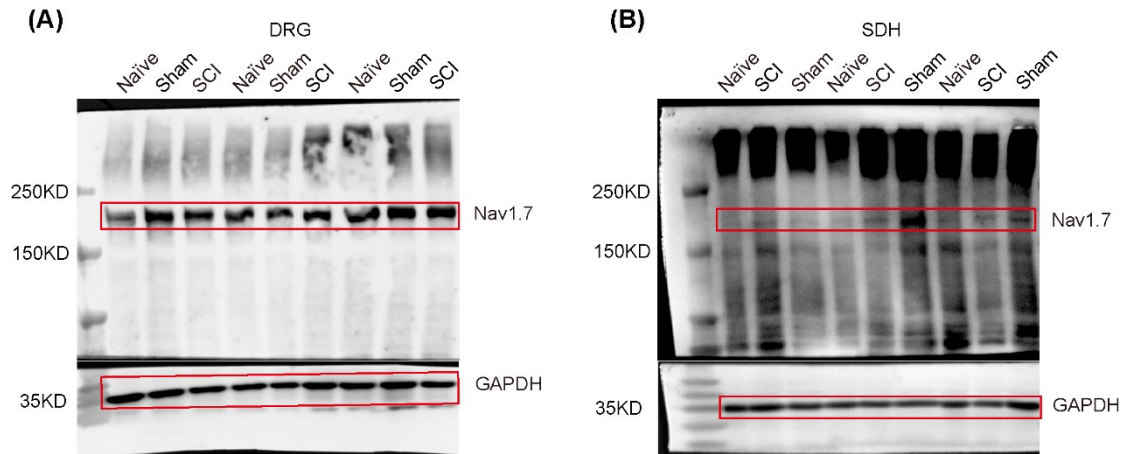

**Supplementary Figure 2.** The entire image of Western-blot membranes related to Fig. 3.

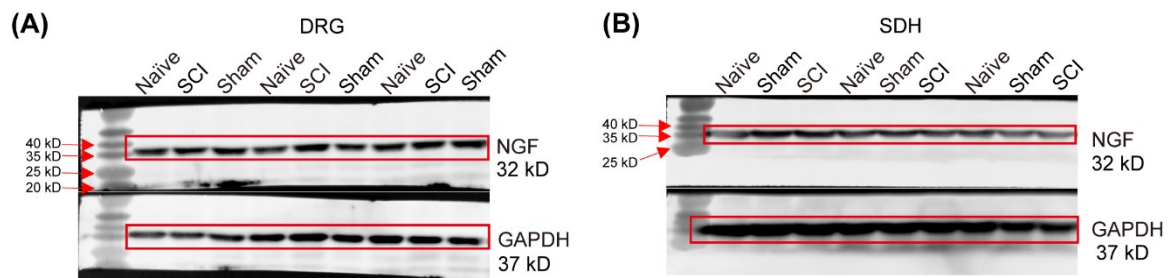

**Supplementary Figure 3.** The entire image of Western-blot membranes related to Fig. 6.

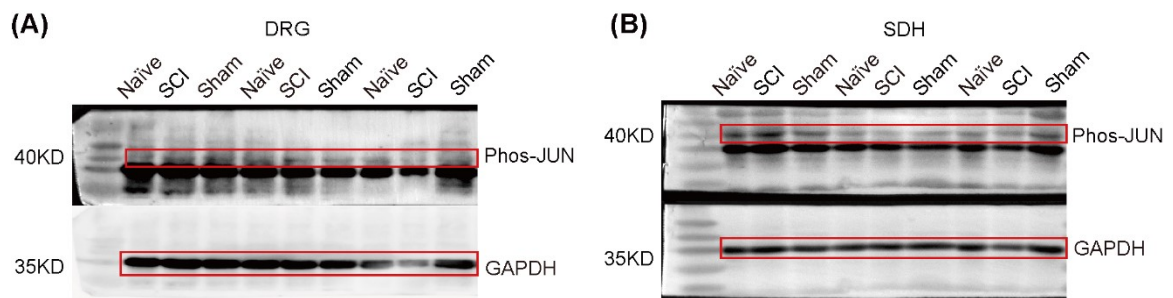

**Supplementary Figure 4.** The entire image of Western-blot membranes related to Fig. 7.
